# Supplementary material
Source: PubMed Central journal article supplement (PMC7595355)
Supplement: NIHMS1636679-supplement-1.pdf [file NIHMS1636679-supplement-1.pdf]

## SUPPLEMENTARY TABLES

### Transgenic expression of human C19MC miRNAs impacts placental morphogenesis

Jean-Francois Mouillet , Julie Goff, Elena Sadovsky, Huijie Sun, Tony Parks, Tianjiao Chu

Yoel Sadovsky

**Supplementary Table 1:** A list of the primer sequences used in this study.

| Name           | Direction | Sequence                    |
|----------------|-----------|-----------------------------|
| <i>Acot4</i>   | Forward   | CCCAAAGAGCTCAACGTCAT        |
|                | Reverse   | GAAAGACCCAGAAGCCCAAT        |
| <i>Amz1</i>    | Forward   | TTCAGGCTCCTGGAGAGGTA        |
|                | Reverse   | AGGTGTCCTCCGACACAGAT        |
| <i>Dll1</i>    | Forward   | CAGCAAACGTGACACCAAGT        |
|                | Reverse   | TCTGGCCTTTTTCTGTCAGG        |
| <i>Dnajb11</i> | Forward   | ACGCAGGAAATTTTGTGGAA        |
|                | Reverse   | TTCTCATCTCTTGCCGACAG        |
| <i>Mmp1a</i>   | Forward   | GATGCTGCTGTTTGTGAGGA        |
|                | Reverse   | GGGATAACCTGGATCCATAGAC      |
| <i>Mrap2</i>   | Forward   | ATCGGACCAGTTTCCTTTGA        |
|                | Reverse   | TTCGTCAGCAAAGTCAGCAC        |
| <i>Pard6g</i>  | Forward   | TGACGACA ACTTCTGCAAGG       |
|                | Reverse   | GCTCCGAAGCTGTAATGGTC        |
| <i>Prl5a1</i>  | Forward   | AAA ACTCACTAAAAATCTGCAGAACA |
|                | Reverse   | TGACCAGGCAGGGTAGTCTT        |
| <i>Psrl1</i>   | Forward   | TGGACGAGACCTTGGACTTC        |
|                | Reverse   | CCGT CGAAGTGGTTTCTCTG       |
| <i>Tdkkh</i>   | Forward   | TCAGTGAGATGACCCAGCAC        |
|                | Reverse   | GCTCGATACCAGGAACCATT        |
| <i>Sry</i>     | Forward   | GTTCAGCCCTACAGCCACAT        |
|                | Reverse   | ATCTCTGTGCCTCCTGGAAA        |

**Supplementary Table 2.** Top molecular and cellular functions based on miRNA targets

| Name                                   | P-value             | #Molecules |
|----------------------------------------|---------------------|------------|
| Cell-to-cell signaling and interaction | 3.02E-03 - 1.02E-07 | 271        |
| Cellular function and maintenance      | 3.19E-03 - 6.25E-07 | 400        |
| Cellular development                   | 3.19E-03 - 1.02E-06 | 265        |
| Cellular growth and proliferation      | 3.19E-03 - 1.02E-06 | 247        |
| Cell morphology                        | 2.69E-03 - 5.00E-06 | 291        |

**Supplementary Table 3.** C19MC miRNA seeds in the 3'UTR of putative mouse target genes.

|                 | Bambi   | Cadm1   | Foxf1 | Foxl2   | Nr4a2   | Ntn4    | Olr1    | Pbx3    | Rnd3    |
|-----------------|---------|---------|-------|---------|---------|---------|---------|---------|---------|
| hsa-miR-519a-3p | NA      | AAGUGCA | NA    | NA      | NA      | NA      | AAGUGCA | NA      | NA      |
| hsa-miR-519b-3p | NA      | AAGUGCA | NA    | NA      | NA      | NA      | AAGUGCA | NA      | NA      |
| hsa-miR-519c-3p | NA      | AAGUGCA | NA    | NA      | NA      | NA      | AAGUGCA | NA      | NA      |
| hsa-miR-519d-3p | AAAGUGC | NA      | NA    | AAAGUGC | AAAGUGC | AAAGUGC | AAAGUGC | AAAGUGC | NA      |
| hsa-miR-520a-3p | AAGUGCU | AAGUGCU | NA    | AAGUGCU | AAGUGCU | AAGUGCU | NA      | AAGUGCU | NA      |
| hsa-miR-520b    | AAGUGCU | AAGUGCU | NA    | AAGUGCU | AAGUGCU | AAGUGCU | NA      | AAGUGCU | NA      |
| hsa-miR-520c-3p | AAGUGCU | AAGUGCU | NA    | AAGUGCU | AAGUGCU | AAGUGCU | NA      | AAGUGCU | NA      |
| hsa-miR-520d-3p | AAGUGCU | AAGUGCU | NA    | AAGUGCU | AAGUGCU | AAGUGCU | NA      | AAGUGCU | NA      |
| hsa-miR-520e    | AAGUGCU | AAGUGCU | NA    | AAGUGCU | AAGUGCU | AAGUGCU | NA      | AAGUGCU | NA      |
| hsa-miR-520f-3p | NA      | NA      | NA    | NA      | NA      | AGUGCUU | NA      | AGUGCUU | AGUGCUU |
| hsa-miR-526b-3p | AAAGUGC | NA      | NA    | AAAGUGC | AAAGUGC | AAAGUGC | AAAGUGC | AAAGUGC | NA      |
